# Supplementary material
Source: PubMed Central journal article supplement (PMC4008336)

# Supplemental Figure 1

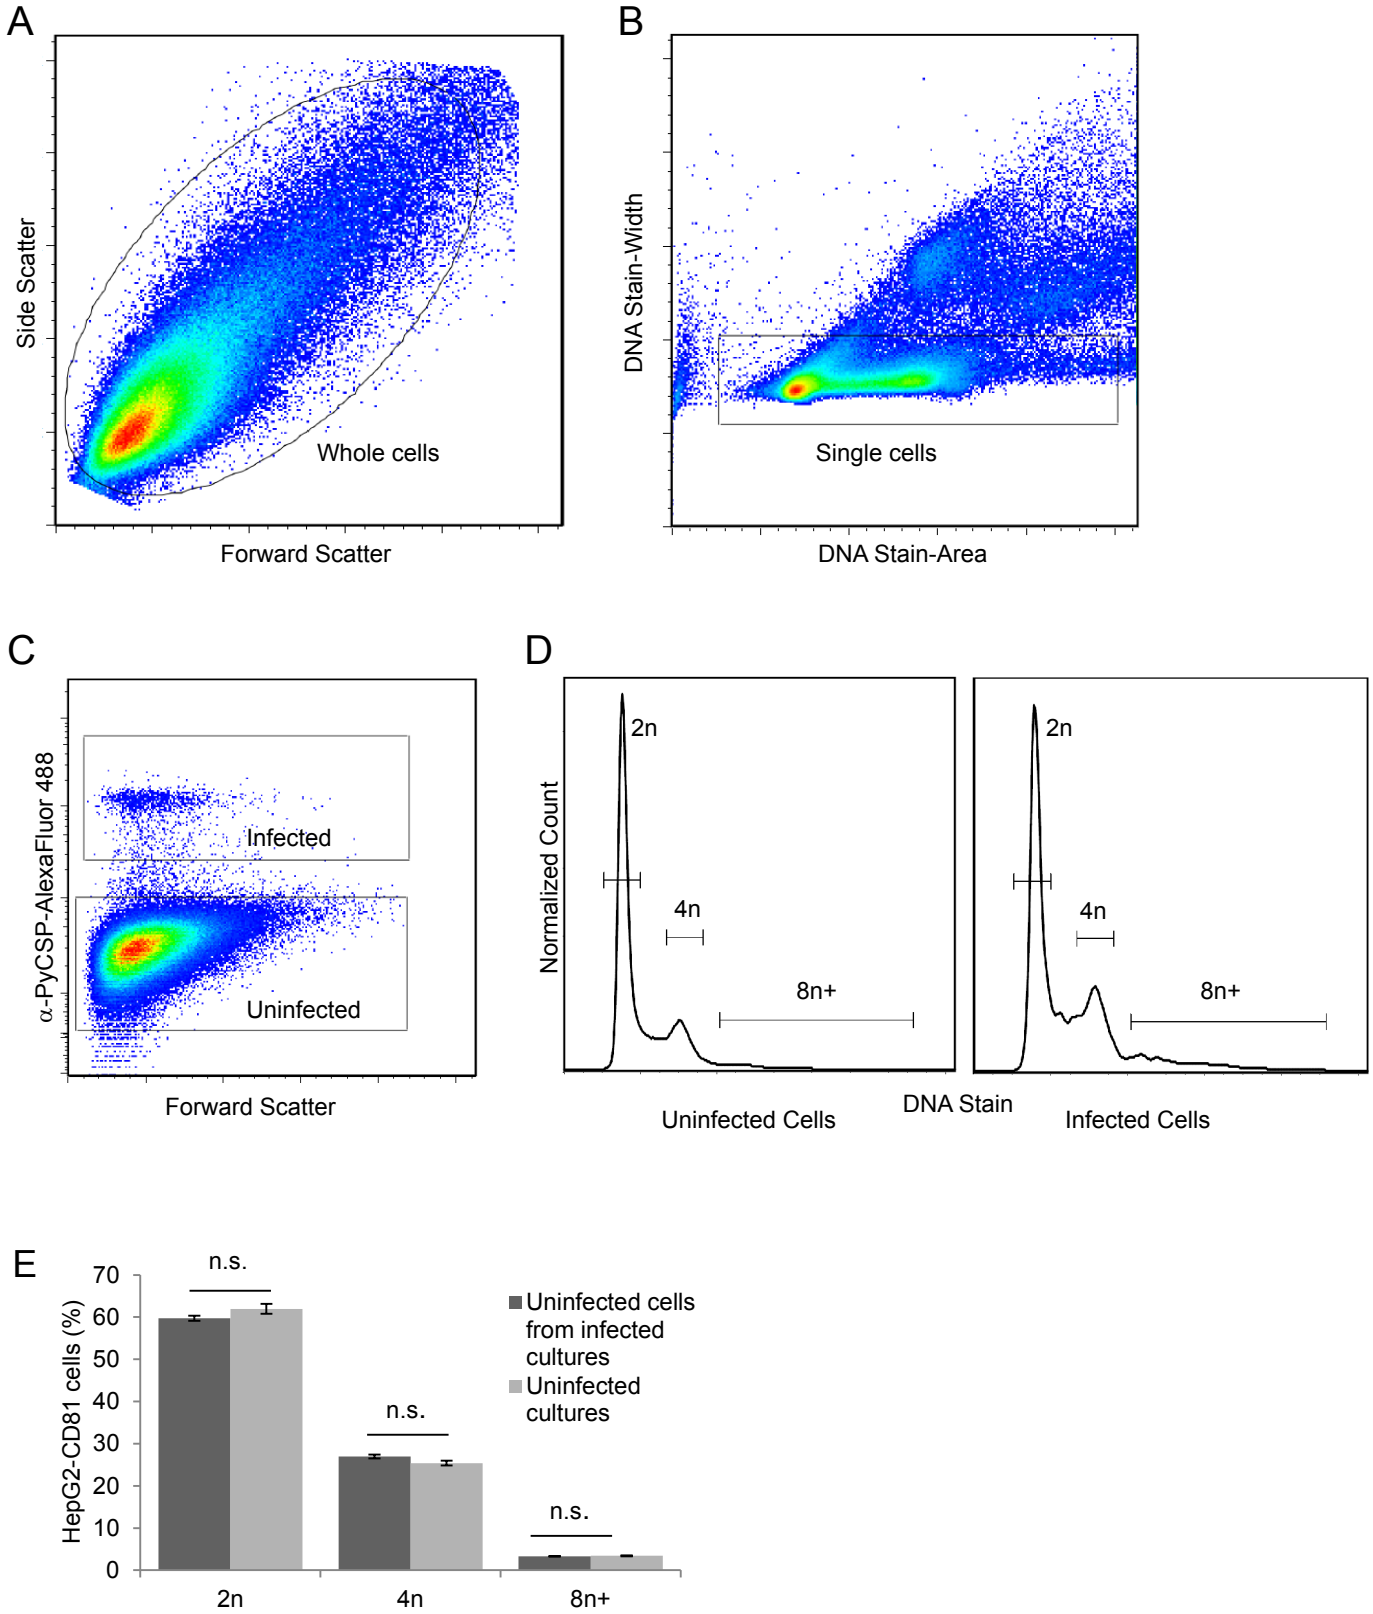

## Supplementary Figure 2

### A

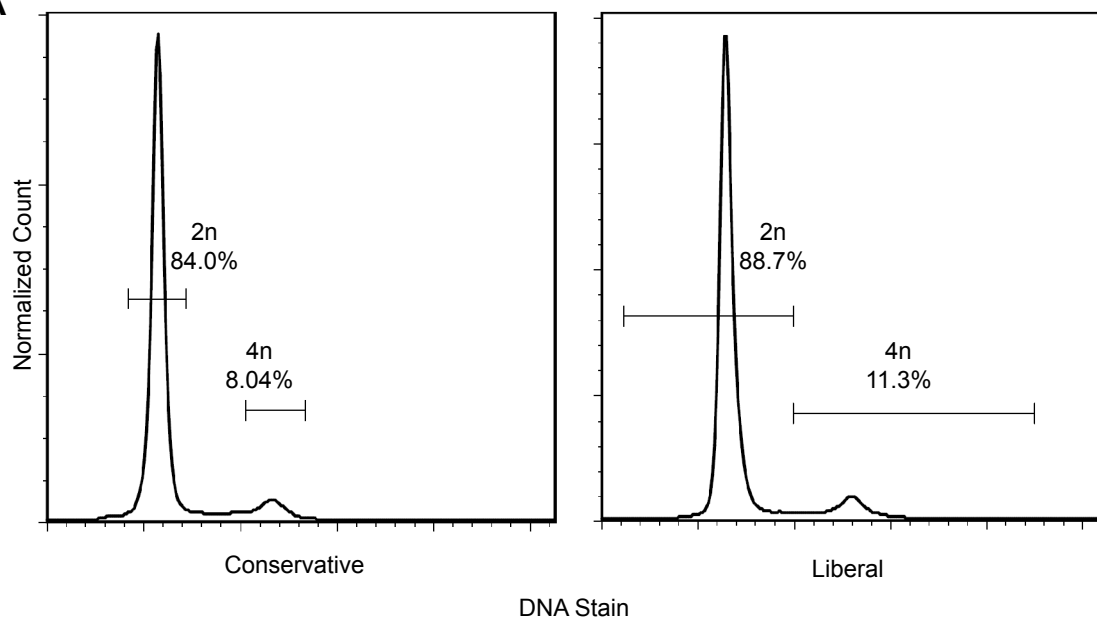

### B

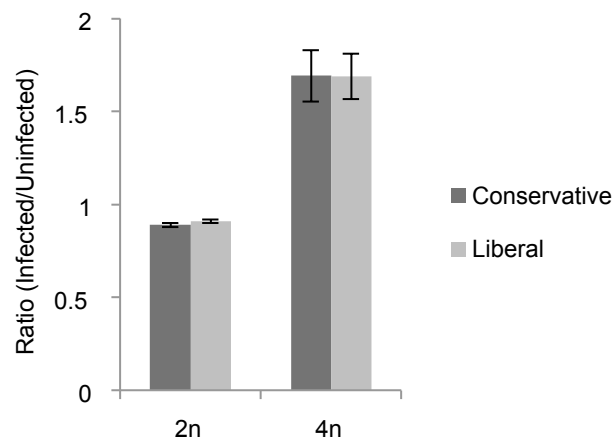

# Supplementary Figure 3

**A**

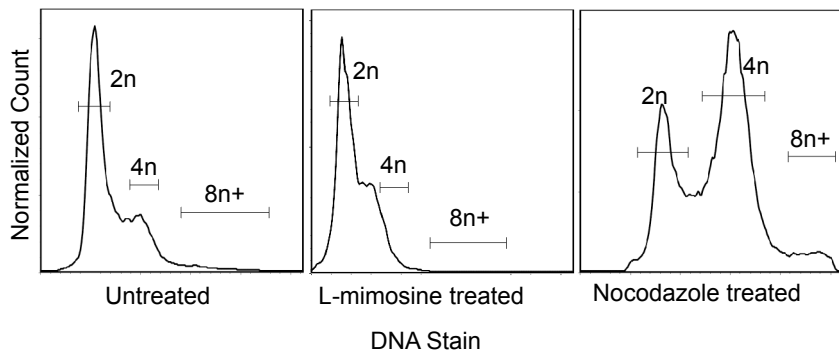

**B**

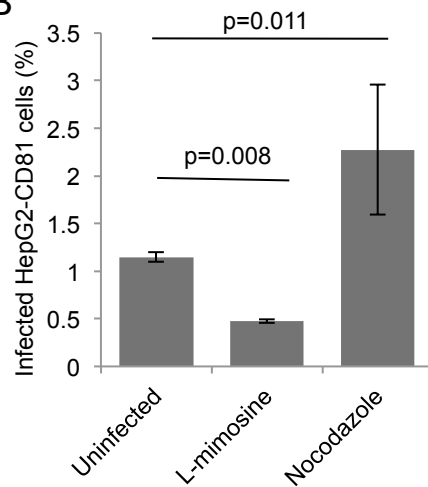

**C**

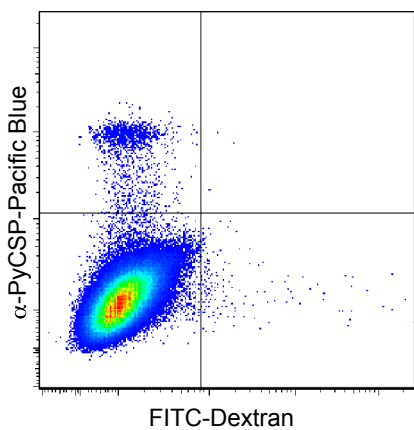

**D**

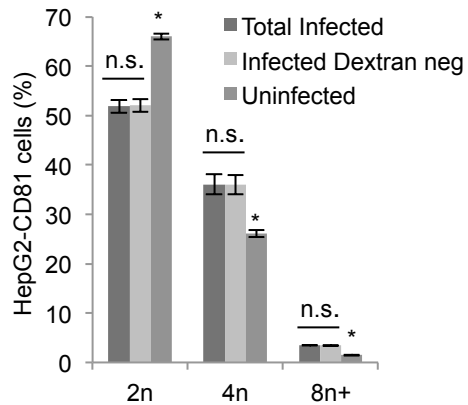

**E**

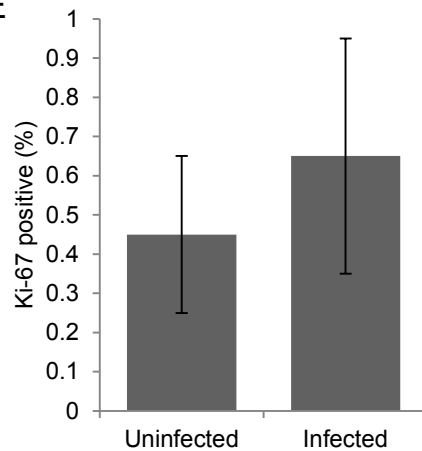

# Supplemental Figure 4

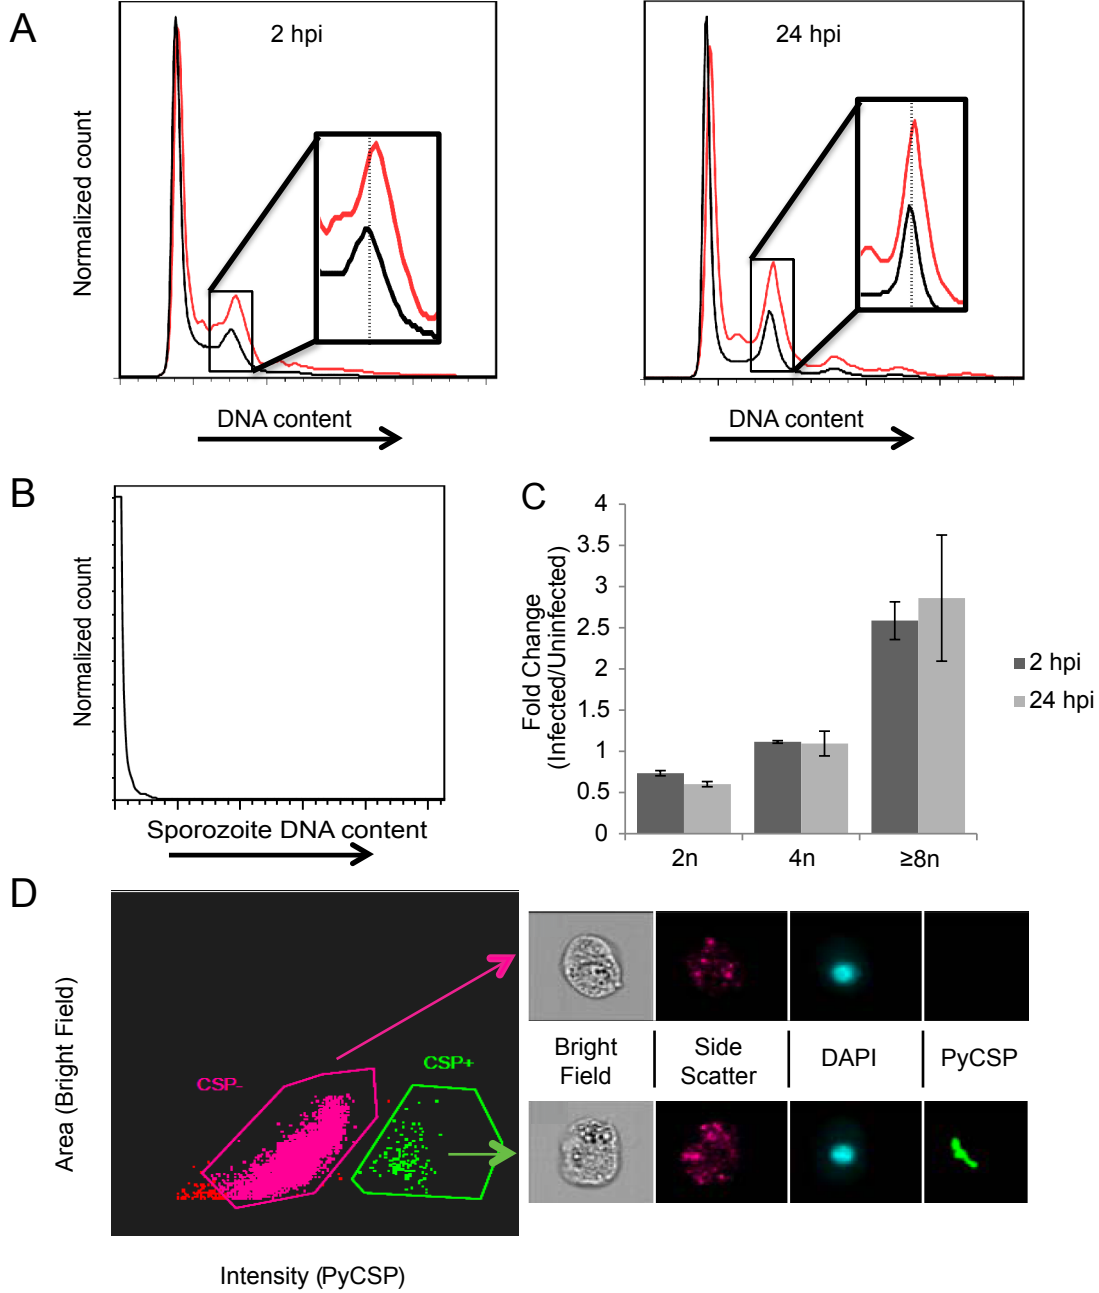

# Supplemental Figure 5

A

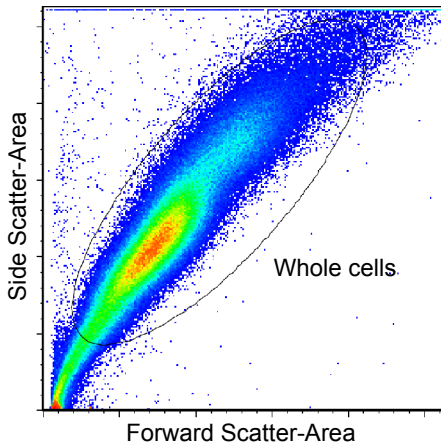

B

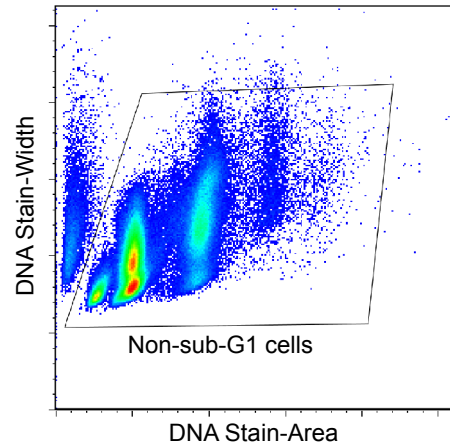

C

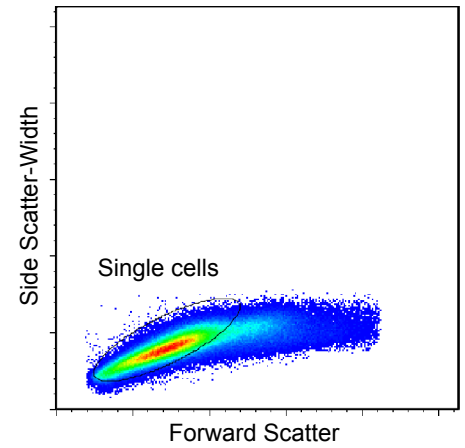

D

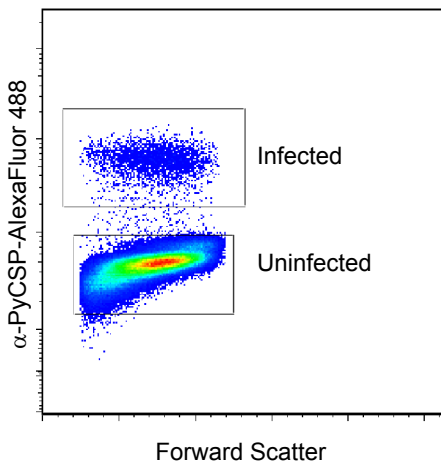

E

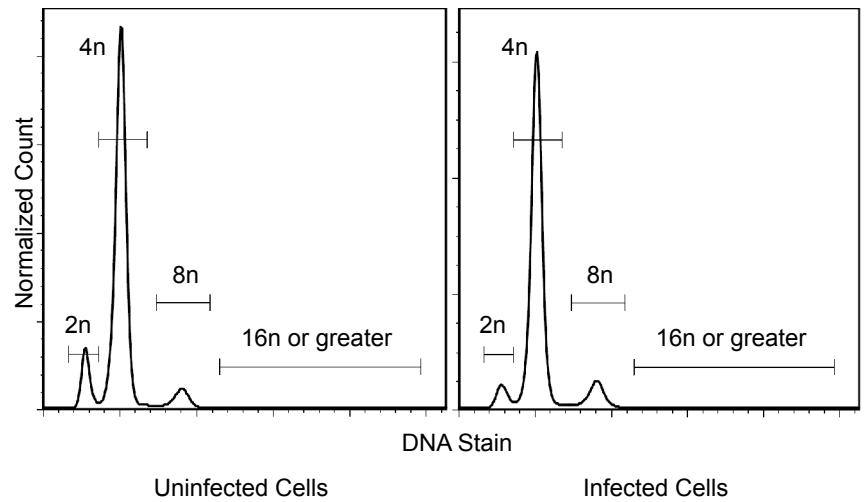

# Supplementary Figure 6

## A

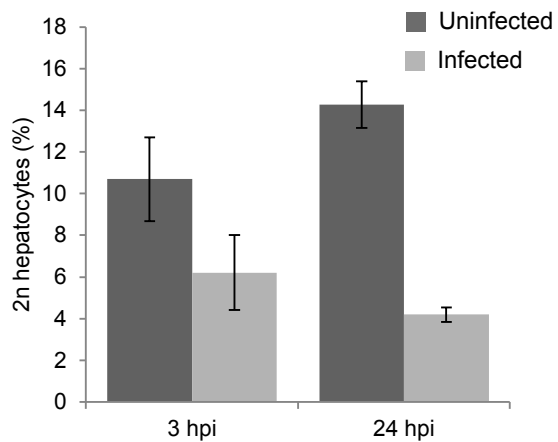

## B

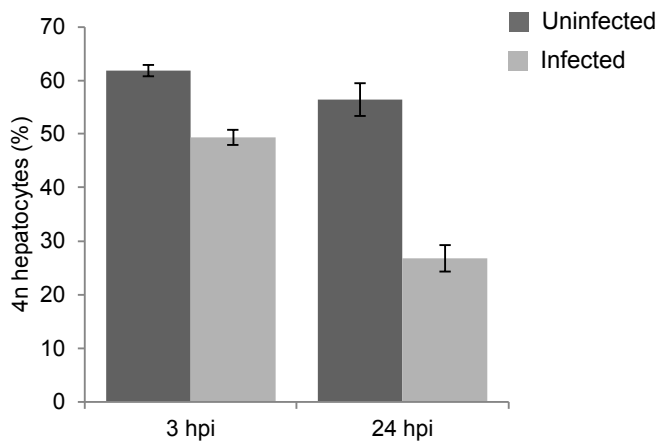

## C

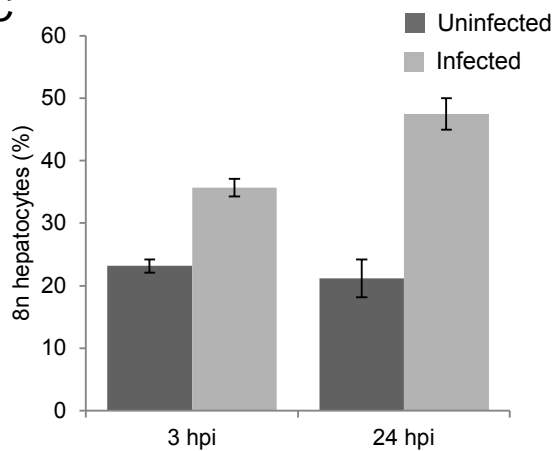

## D

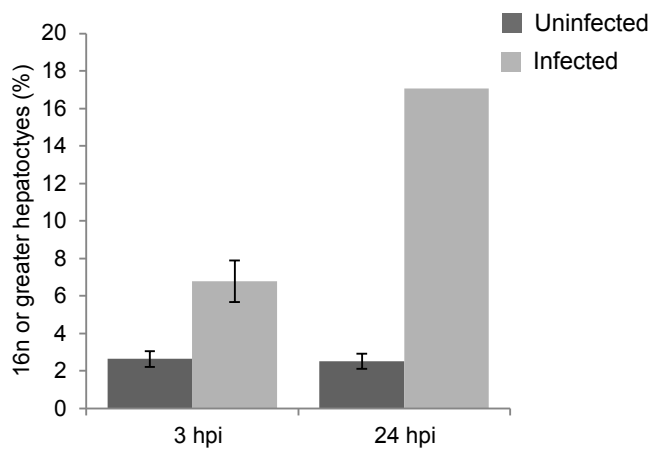

# Supplementary Figure 7

## A

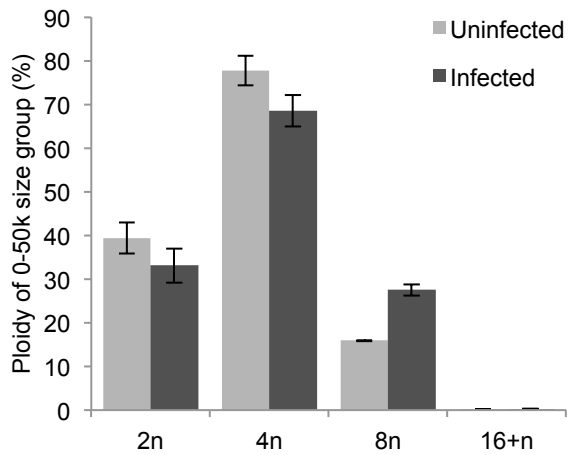

## B

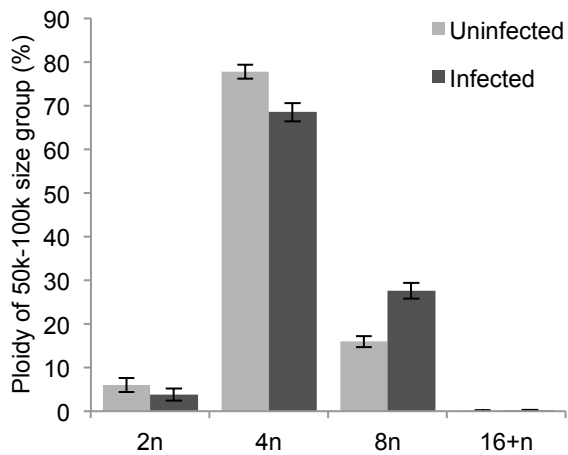

## C

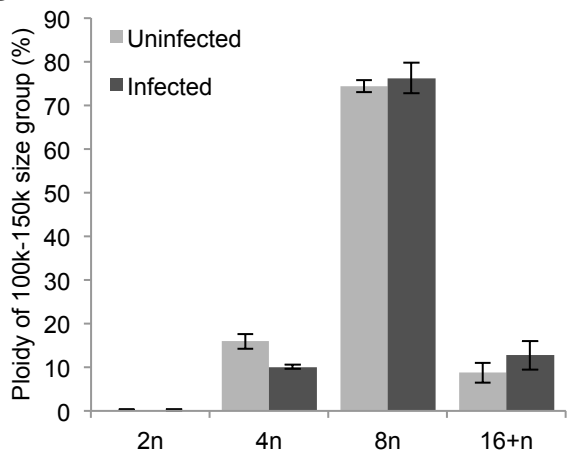

## D

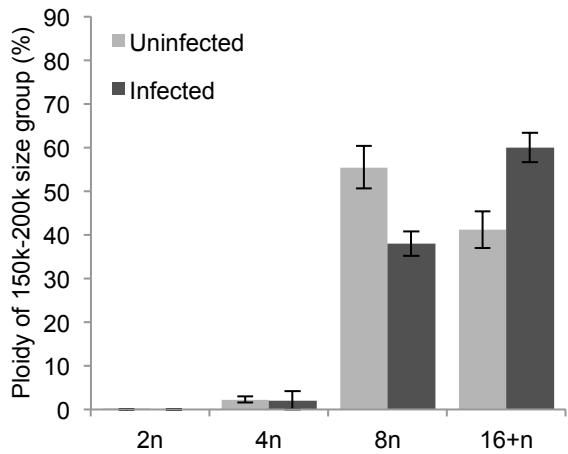

Supplement: NIHMS572372-supplement-supp_FigS1-S7.pdf [file NIHMS572372-supplement-supp_FigS1-S7.pdf]
